# Supplementary figures and images for: Pattern of Antibiotic Dispensing at Pharmacies According to the WHO Access, Watch, Reserve (AWaRe) Classification in Bangladesh
Source: MDPI journal article supplement (doi:10.3390/antibiotics11020247), 2022-02-14

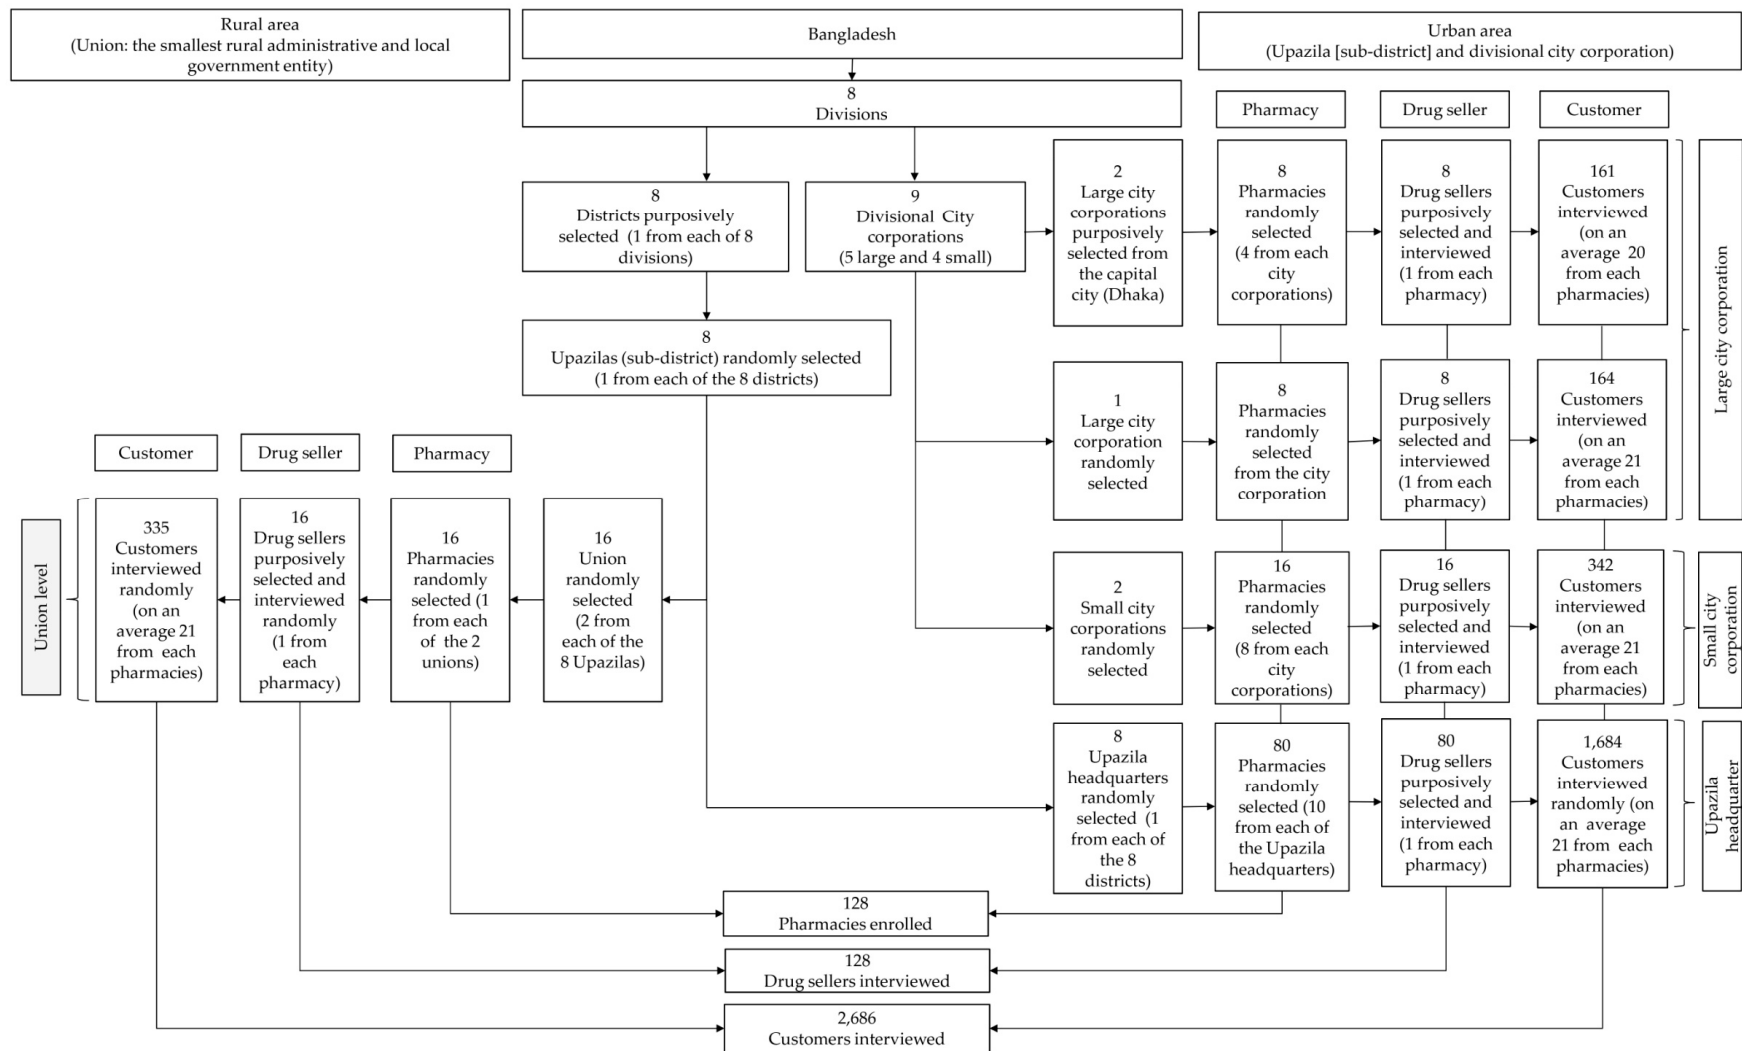

**Figure S1.** Study sites and study population selection flowchart

Supplement: s1 [file s1]
